# Supplementary material for: An Online Training Module on the Cultural Formulation Interview: The Case of New York State
Source: Atypon-hosted journal article supplement (doi:10.1176/appi.ps.201800119), 2018-07-25
Supplement: appi.ps.201800119.ds001.pdf [file appi.ps.201800119.ds001.pdf]

Table 1: Evaluation Scores from the CFI Training Module among 423 participants.

| Likert Question                                                                                                                                    | 1  |   | 2  |    | 3   |    | 4   |    | 5   |    | Average |     |
|----------------------------------------------------------------------------------------------------------------------------------------------------|----|---|----|----|-----|----|-----|----|-----|----|---------|-----|
|                                                                                                                                                    | N  | % | N  | %  | N   | %  | N   | %  | N   | %  | M       | SD  |
| As a result of this training I better understand the type of information the Cultural Formulation Interview can help me obtain                     | 5  | 1 | 4  | 1  | 40  | 9  | 203 | 48 | 171 | 40 | 4.26    | .76 |
| The training content was presented in a clear/organized manner and was consistent with the course learning objectives                              | 6  | 1 | 5  | 1  | 42  | 10 | 211 | 50 | 159 | 38 | 4.21    | .78 |
| I would like to receive further training on the Cultural Formulation Interview                                                                     | 9  | 2 | 26 | 6  | 102 | 24 | 181 | 43 | 105 | 25 | 3.82    | .95 |
| The training met its stated objectives                                                                                                             | 7  | 2 | 0  | 0  | 42  | 10 | 200 | 47 | 174 | 41 | 4.26    | .77 |
| As a result of this training I better understand how to conduct a Cultural Formulation Interview                                                   | 4  | 1 | 3  | 1  | 41  | 10 | 211 | 50 | 164 | 39 | 4.25    | .73 |
| As a result of this training I have a clearer idea of how to start implementing the Cultural Formulation in my service/program                     | 4  | 1 | 3  | 1  | 51  | 12 | 224 | 53 | 141 | 33 | 4.17    | .73 |
| The training included information that was new to me                                                                                               | 10 | 2 | 22 | 5  | 73  | 17 | 216 | 51 | 102 | 24 | 3.89    | .91 |
| As a result of this training I can better define culture and cultural assessment                                                                   | 8  | 2 | 7  | 2  | 46  | 11 | 206 | 49 | 156 | 37 | 4.17    | .82 |
| This online module is user-friendly                                                                                                                | 9  | 2 | 18 | 4  | 56  | 13 | 196 | 46 | 144 | 34 | 4.06    | .91 |
| As a result of this training I better understand the importance of cultural assessments in ensuring consumer engagement and providing quality care | 5  | 1 | 8  | 2  | 51  | 12 | 195 | 46 | 164 | 39 | 4.19    | .81 |
| Overall, how would you rate the CFI training module (with 5 stars being the best)?                                                                 | 1  | 0 | 17 | 4% | 55  | 13 | 202 | 48 | 148 | 35 | 4.13    | .80 |

<sup>a</sup>1=Strongly disagree; 2=Disagree; 3=Neither disagree nor agree; 4=Agree; 5=Strongly agree
